# Supplementary material
Source: publisher figshare collection journal article supplement (https://microbiology.figshare.com/articles/dataset/_/11316599)
Supplement: Supplementary file 1 [file 1]

# DEN-IM: Dengue virus genotyping from amplicon and shotgun metagenomic sequencing

## Supplemental Material

### Dengue virus reference databases

We have compiled a database of 3858 complete DENV genomes obtained from the NIAID Virus Pathogen Database and Analysis Resource (ViPR) in October 2019 (1) (<http://www.viprbrc.org/>). The sequences were distributed unevenly throughout the four DENV serotypes, with DENV-1 being the most represented with 1636 sequences (42.72%), followed by DENV-2 with 1067 sequences (27.86%), DENV-3 with 807 sequences (21.07%), and DENV-4 with 320 sequences (8.36%). The selection criteria for the search were as follows: a) complete genome sequence only, b) human or mosquito host, c) collection year (1950-2018). Data available from all countries was included and duplicated sequences were removed and only the sequences with sub-type data were kept. A representative of DENV serotype 1 genotype III was introduced (EF457905, recovered from monkey) as no representatives were available with the search criteria used. This genotype is sylvatic and considered extinct (2,3). Additionally, any sample with IUPAC codes in the sequence provided were excluded.

In order to recover the maximum number of DENV reads from the input HTS data in the first mapping step (Figure 1), we maintained the database with the 3858 complete DENV genomes to retain as much diversity as possible. This database is referred as **DENV mapping database** and is available on GitHub at [https://github.com/B-UMMI/DEN-IM/blob/master/ref/DENV\\_MAPPING\\_V3.fasta](https://github.com/B-UMMI/DEN-IM/blob/master/ref/DENV_MAPPING_V3.fasta).

For typing purposes, overly similar sequences in the collection were removed from the database by clustering the sequences in each serotype at 98% nucleotide similarity with CD-HIT (4), leaving 161 representative sequences of all described DENV serotypes and genotypes, with 46 DENV-1 sequences (Table S6), 63 DENV-2 (Table S7), 25 DENV-3 (Tables S8) and 27 DENV-4 (Table S9). This database is referred as DENV typing database and is available on GitHub at [https://github.com/B-UMMI/DEN-IM/blob/master/ref/DENV\\_TYPING\\_V3.fasta](https://github.com/B-UMMI/DEN-IM/blob/master/ref/DENV_TYPING_V3.fasta). This step is necessary to speed up the classification step for genotyping.

Phylogenetic analysis of typing collection was performed by aligning the full reference genomes with MAFFT (5), in auto mode and with automatic sequence orientation adjustment. A phylogenetic tree was inferred with RAxML (version 8.12.11) (6) using the GTR- $\Gamma$  substitution model and 500 times bootstrap. Additionally, the same analysis was performed with the envelope protein (E) only, as this region has been used traditionally for sero- and genotyping (7–13), and continues to be the standard in many laboratories for genotyping. The resulting trees are available as supplemental material (Figures S4 to S7) and on Figshare (<https://10.6084/m9.figshare.9331826>).

The sequence JF459993 from the DENV-1 collection, as of April 2019, was annotated in ViPR as belonging to genotype IV, but in our analysis, it clustered within genotype I clade (Figure S4). The classification of DENV-1 I was also obtained from GenomeDetective Dengue Subtyping Tool (<https://www.genomedetective.com/app/typingtool/dengue/>), so we proceeded to alter the annotation of this particular sample (Table S6).

In order to harmonise dengue nomenclature, the system uses Roman-numeric labels to identify the genotype, with the exception of Serotype 2 (Table S4), which used both Roman-numeric and geographic origin due to the widespread adoption of the latter.

## Workflow parameters

The short-read data is passed as input through the “*--fastq*” parameter, that by default is set to match all files in the “fastq” folder that match the pattern “\*\_R{1,2}\*”. Both paired and single-end sequencing data can be passed through with the “*--fastq*” parameter, as defined by the pattern used.

In the process to verify the integrity of the short-read raw sequencing data, the integrity of the input files is assessed by attempting to decompress and read the files. An estimation of the depth of coverage is also performed. By default, the input size (“*--genomeSize*”) is set to 0.012 Mb and the minimum coverage depth (“*--minCoverage*”) is set to 10. If any input file is found to be corrupt, its progression in the workflow is aborted.

In the FastQC and Trimmomatic module, FastQC (<https://www.bioinformatics.babraham.ac.uk/projects/fastqc/>) is run with the parameters “*--extract --nogroup --format fastq*”. FastQC will inform Trimmomatic (14) on how many bases to trim from the 3’ and 5’ ends of the raw reads. By default, Trimmomatic uses the default set of Illumina adapters provided with the workflow but this behaviour can be overwritten with the “*--adapters*” parameter. The additional Trimmomatic parameters “*--trimSlidingWindow*”, “*--trimLeading*”, “*--trimTrailing*” and “*--trimMinLength*” can all be set to different values.

The removal of low complexity sequences is done with PrinSeq (15) using a custom parameter (“*--pattern*”), which by default is set to the value “A 50%; T 50%; N 50%”, removing sequences whose content is at least half composed of a polymeric sequence (A, T or N).

To retrieve the reads that map to the DENV reference database, Bowtie2 (16) is run with default parameters with the DENV mapping database as a reference. For paired-end data, the reads and their mates that map to the reference are retrieved with “*samtools view -buh -F 12*” and “*samtools fastq*” commands. In single-end reads, all mapped reads are retrieved with “*samtools view -buh -F 4*” and “*samtools fastq*”. The DENV mapping database can be altered with the “*--reference*” parameter, or alternatively, a Bowtie2 index can be provided with the “*--index*” parameter. This allows for the workflow to work with other databases obtained through public and owned DENV genomes. The coverage estimation step is performed on the retrieved DENV reads with the same parameters as the first estimation (“*--genomeSize=0.012*” and “*--minCoverage=10*”).

In the assembly process, the retrieved DENV reads are firstly assembled with SPAdes Genome Assembler (17) with the options “*--careful --only-assembler --cov-cutoff*”. The coverage cut-off is dictated by the “*--spadesMinCoverage*” and “*--spadesMinKmerCoverage*” parameters, set to 2 by default. If the assembly with SPAdes fails to produce a contig equal or greater than the value defined in the “*--minimumContigSize*” parameter (default of 10000), the data is re-assembled with the MEGAHIT assembler (18) with default parameters. By default, the k-mers to be used in the assembly in both tools (“*--spadesKmers*” and “*--megahitKmers*”) are automatically determined depending on the read size. If the maximum read length is equal or greater than 175 nucleotides, the assembly is done with the k-mers “55, 77, 99, 113, 127”, otherwise the k-mers “21, 33, 55, 67, 77” are used.

To correct the assemblies produced, the Pilon tool (19) is run after mapping the QC’ed reads back to the assembly with Bowtie2 and “*samtools sort*”. This process also verifies the coverage and the number of contigs produced in the assembly. The behaviour can be altered with the parameters “*--minAssemblyCoverage*”, “*--AMaxContigs*” and “*--genomeSize*”, set to “auto”, 1000 and 0.01 Mb by default. The first parameter, when set to ‘auto’, the minimum assembly coverage for each contig required is set to the 1/3 of the assembly mean coverage or to a minimum of 10x. The ratio of contig number per genome MB is calculated based on the genome size estimation for the samples.

The contigs larger than the value defined in the “*--size*” parameter (default of 10000 nucleotides) are considered to be complete CDSs and follow the rest to the workflow independently. If no complete CDS is recovered, the QC’ed read data is passed to the mapping to module that does the DENV typing database and consensus generation.

The serotyping and genotyping are performed with the Seq\_Typing tool (20) with the command "seq\_typing.py assembly" or "seq\_typing.py reads", using as reference the provided curated DENV typing database. It is possible to retrieve the genomes of the closest references and include them in the downstream analysis by changing the "--get\_reference" option to "true". By default, this is not included in the analysis.

The CDSs, and the reference sequences if requested, are aligned with the MAFFT tool (5) with the options "--adjustdirection -auto". By default, four representative sequences for each DENV serotype (1 to 4) from NCBI is also included in the alignment. This option can be turned off by changing the value of "--includeNCBI" to "false". If the number of sequences in the alignment is less than 4 these are automatically added.

A maximum likelihood phylogenetic tree is obtained with the RaXML tool (6) with the options "-p 12345 -f -a". Additionally, and by default, the substitution model ("--substitutionModel") is set to "GTRGAMMA", the bootstrap is set to 500 ("--bootstrap") and the seed to "12345" ("--seedNumber").

## Shotgun Metagenomics Sequencing Data

Samples of plasma (n=9) and serum samples (n=13) from confirmed dengue symptomatic patients were collected in Venezuela between 2010-2015 (Table S2) (see Availability of supporting materials). DENV positivity was confirmed by either RT-qPCR (21)(21) or nested RT-PCR (9).

As a positive control sample, the supernatant of a viral culture containing DENV-2 strain 16681 was used. The negative control sample consisted of DNA- and RNA-free water (Sigma-Aldrich, St. Louis, MO, USA).

A spiked sample was produced consisting of a mixture of four 5 µl of cDNA isolated from clinical samples including all DENV serotypes (DENV-1 to -4). The viral cDNA for these samples was not in equal concentration and the viral copy number in the clinical samples was assessed by RT-PCR (9). The results were as follow: DENV-2 with 1070000 copies/µl, DENV-1 with 117830 copies/µl, DENV-3 with 44300 copies/µl and DENV-4 with 6600 copies/µl.

The cDNA libraries were generated using either the NEBNext® RNA First and Second strand modules and the Nextera XT DNA library preparation kit (NXT), or the TruSeq RNA V2 library preparation kit (TS). The libraries were sequenced in MiSeq and NextSeq instruments using 300-cycles v2 paired-end cartridges.

The DEN-IM workflow was executed with the raw sequencing data using the default parameters and resources in an HPC cluster with 300 Cores/600 Threads of Processing Power and 3 TB RAM divided through 15 computational nodes, 9 with 254 GB Ram and 6 with 126GB RAM.

## Amplicon Sequencing Data

The accession numbers for the 106 DENV-3 paired-end amplicon sequencing paired-end short-read datasets are available under BioProject PRJNA394021. The accession numbers for the 78 DENV-1 amplicon sequencing single-end short-read datasets are available under BioProject PRJNA321963. The Run Accession IDs for both sets were obtained with NCBI's RunSelector and the raw data was downloaded with the GetSeqENA tool (<https://github.com/B-UMMI/getSeqENA>).

The DEN-IM workflow was executed with the raw sequencing data with default parameters and resources in the same HPC cluster as the shotgun metagenomics dataset.

## Non-DENV Arbovirus Data

The accession numbers for the 132 samples, belonging to zika virus (ZKV), chikungunya virus (CHIKV) and yellow fever virus (YFV) amplicon and metagenomic datasets are available as supplemental material (Table S4). As with the amplicon sequencing dataset, the list of Run Accession

IDs was obtained with NCBI's RunSelector and the raw data was downloaded with the GetSeqENA tool (<https://github.com/B-UMMI/getSeqENA>).

The DEN-IM workflow was executed with default parameters and resources in the same HPC cluster as the amplicon and shotgun metagenomics datasets.

## Supplemental tables

**Table S1** – Collection date, serotype confirmation and run accession identifier for the metagenomic sequencing dataset.

**Table S2** - Run accession ID, BioProject SRA Study ID, source and organism present for each sample of the negative control dataset (ZKV – zika virus, CHIKV – chikungunya virus, YFV – yellow fever virus).

**Table S3** – Number of raw base pairs, overall alignment rate against the DENV mapping database, estimated coverage depths and serotype and genotype for 25 shotgun metagenomics sequencing samples.

**Table S4** - Number of raw base pairs, overall alignment rate, in percentage, for the mapping against the DENV database, number of ORFs recovered, and respective serotype and genotype for 106 paired-end amplicon sequencing samples.

**Table S5** - Taxonomic profiling results for the amplicon sequencing samples with less than 70% DENV DNA.

**Table S6** - Number of raw base pairs, overall alignment rate, in percentage, for the mapping against the DENV database, number of ORFs recovered, and respective serotype and genotype for 78 single-end amplicon sequencing samples.

**Table S7** - Representative sequences of serotype 1 diversity in the Dengue Virus Typing Database.

**Table S8** - Representative sequences of serotype 2 diversity in the Dengue Virus Typing Database.

**Table S9** - Representative sequences of serotype 3 diversity in the Dengue Virus Typing Database.

**Table S10** - Representative sequences of serotype 4 diversity in the Dengue Virus Typing Database.

169

170 **Supplemental Figures**

a)

Quality control

Search ID column

| ID              | Raw BP<br>integrity_coverage_1_1 | Reads<br>integrity_coverage_1_1 | Coverage<br>integrity_coverage_1_1 | Trimmed (%)<br>trimmomatic_1_2 | Coverage<br>check_coverage_1_6 |
|-----------------|----------------------------------|---------------------------------|------------------------------------|--------------------------------|--------------------------------|
| cc0030b_S21     | 399040452                        | 2642652                         | 33253.37                           | 60.28                          | 677.96                         |
|                 |                                  | 7630478                         | 64442.24                           | 19.72                          | 2313.99                        |
|                 |                                  | 11667104                        | 93055.73                           | 18.53                          | 5.65                           |
|                 |                                  | 9719438                         | 77058.27                           | 25.77                          | 3016.17                        |
| 91-0115_S7_L001 | 179244760                        | 1333220                         | 14937.06                           | 32.56                          | 3.74                           |
| 91-0109_S4_L001 | 91710149                         | 656462                          | 7642.51                            | 4.23                           | 1287.52                        |
| CC0066          | 1087454460                       | 13700000                        | 90621.21                           | 47.98                          | 569.7                          |
| CC0067          | 1022064484                       | 10484336                        | 85172.04                           | 19.27                          | 2548.84                        |
| CC0061          | 1262837603                       | 12935424                        | 105236.47                          | 19.15                          | 5120.4                         |
| 91-0118_S8_L001 | 195267140                        | 1423414                         | 16272.26                           | 53.42                          | 86.53                          |

Previous Page 2 of 3 10 rows Next

Current selection: 0

b)

| ID                                                           | seqtyping<br>dengue_typing_assembly_1_11 | Identity<br>dengue_typing_assembly_1_11 | Coverage<br>dengue_typing_assembly_1_11 | Reference<br>dengue_typing_assembly_1_11 |
|--------------------------------------------------------------|------------------------------------------|-----------------------------------------|-----------------------------------------|------------------------------------------|
| Spike_NODE_3_length_10199_cov_229.022822_pilon               | 1-V                                      | 98.03                                   | 100                                     | gb:EU482591                              |
| 91-0132_S6_L001_NODE_1_length_10217_cov_2041.464103_pilon    | 1-V                                      | 98.03                                   | 100                                     | gb:EU482591                              |
| CC0031_k77_16_flag_0_multi_50991.9804_len_10085_pilon        | 2-III(AsianAmerican)                     | 99.21                                   | 98.95                                   | gb:FJ024473                              |
| cc0007_S5_L001_NODE_1_length_10200_cov_119.535810_pilon      | 2-III(AsianAmerican)                     | 99.22                                   | 100                                     | gb:FJ024473                              |
| 91-0105_S2_L001_NODE_1_length_10207_cov_218.928825_pilon     | 2-III(AsianAmerican)                     | 98.72                                   | 100                                     | gb:FJ024473                              |
| Spike_NODE_4_length_10192_cov_76.477014_pilon                | 2-III(AsianAmerican)                     | 98.66                                   | 100                                     | gb:FJ024473                              |
| CC0150_NODE_1_length_10242_cov_3878.632859_pilon             | 2-III(AsianAmerican)                     | 99.13                                   | 100                                     | gb:FJ024473                              |
| 91-0109_S4_L001_NODE_1_length_10219_cov_652.125222_pilon     | 2-III(AsianAmerican)                     | 98.86                                   | 100                                     | gb:FJ024473                              |
| 91-0104_NODE_1_length_10181_cov_326.327573_pilon             | 2-III(AsianAmerican)                     | 98.72                                   | 100                                     | gb:FJ024473                              |
| 92-1084_NODE_1_length_10194_cov_816.395572_pilon             | 2-III(AsianAmerican)                     | 98.67                                   | 100                                     | gb:FJ024473                              |
| Podivcontrol_S21_L001_k77_1_multi_18626.0847_len_10237_pilon | 2-V(Asian)                               | 100                                     | 100                                     | gb:GQ868591                              |
| CC0011_NODE_1_length_10201_cov_607.828724_pilon              | 3-III                                    | 98.7                                    | 100                                     | gb:EU687233                              |
| Spike_NODE_1_length_10266_cov_2032.312101_pilon              | 3-III                                    | 98.36                                   | 100                                     | gb:EU687233                              |
| CC0009_NODE_1_length_10208_cov_2013.867437_pilon             | 3-III                                    | 98.61                                   | 99.97                                   | gb:EU687233                              |
| 91-0118_S8_L001_NODE_1_length_10178_cov_13.815371_pilon      | 3-III                                    | 98.44                                   | 99.99                                   | gb:EU687233                              |
| cc0010_S8_L001_NODE_1_length_10206_cov_450.729095_pilon      | 3-III                                    | 98.66                                   | 100                                     | gb:EU687233                              |
| CC0061_k77_1_multi_4641.2458_len_10267_pilon                 | 4-II                                     | 98.51                                   | 100                                     | gb:KP188557                              |
| CC0067_NODE_1_length_10197_cov_734.756522_pilon              | 4-II                                     | 98.78                                   | 100                                     | gb:KP188557                              |
| cc0030a_S12_k77_1_multi_2605.9226_len_10163_pilon            | 4-II                                     | 98.92                                   | 99.82                                   | gb:KP188557                              |
| cc0030b_S21_NODE_1_length_10173_cov_54.900771_pilon          | 4-II                                     | 98.92                                   | 100                                     | gb:KP188557                              |
| CC0116_k77_2_multi_2097.0000_len_10197_pilon                 | 4-II                                     | 98.67                                   | 100                                     | gb:KP188557                              |
| Spike_NODE_2_length_10203_cov_29.787675_pilon                | 4-II                                     | 98.75                                   | 99.95                                   | gb:KP188557                              |
| CC0066_NODE_1_length_10174_cov_40.432750_pilon               | 4-II                                     | 98.5                                    | 100                                     | gb:KP188557                              |
| 91-0106_S12_L001_k77_17_multi_13.3022_len_10127_pilon        | 4-II                                     | 98.72                                   | 99.67                                   | gb:KP188557                              |

**Figure S1 - DEN-IM report tables. a)** DEN-IM's quality control report containing information of the number of base-pairs and the number of reads for the analysed samples, the estimated coverage depth before and after mapping, and the percentage of reads in the input data that were trimmed. **b)** DEN-IM's typing report for 24 CDSs recovered from the metagenomic dataset. The ID contains the CDS contig name, the typing result for serotype-genotype, the values for identity and coverage, and the GenBank ID of the closest reference in the Typing Database containing 161 complete DENV genomes.

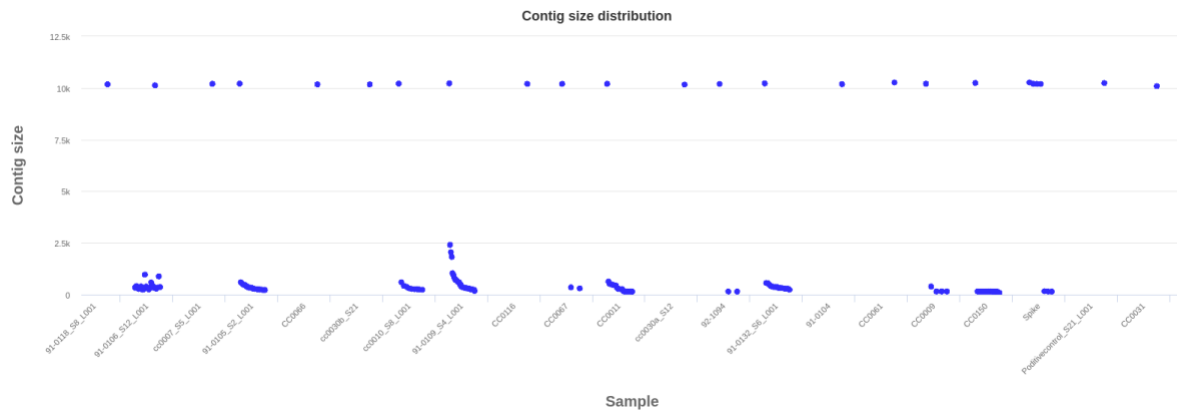

**Figure S2** - Contig size distribution for the shotgun metagenomics sequencing dataset. Each dot depicts an assembled DENV contig. Above the 10Kb are full CDS of DENV.

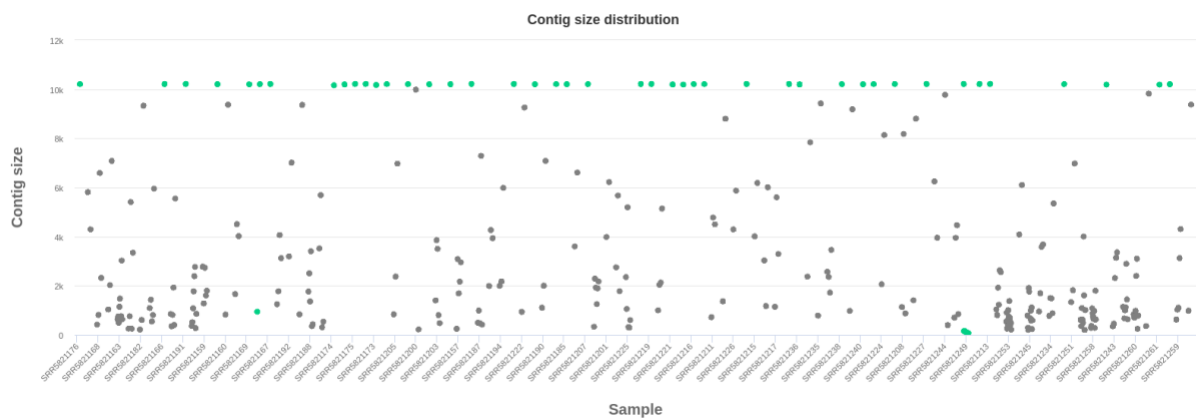

**Figure S3** - Contig size distribution of the amplicon sequencing dataset with 106 paired-end samples. Each dot depicts an assembled DENV contig. Above the 10Kb are full CDS of DENV. Contigs belonging from samples that assembled a complete DENV CDS are highlighted in green, whereas the remaining are coloured in grey.

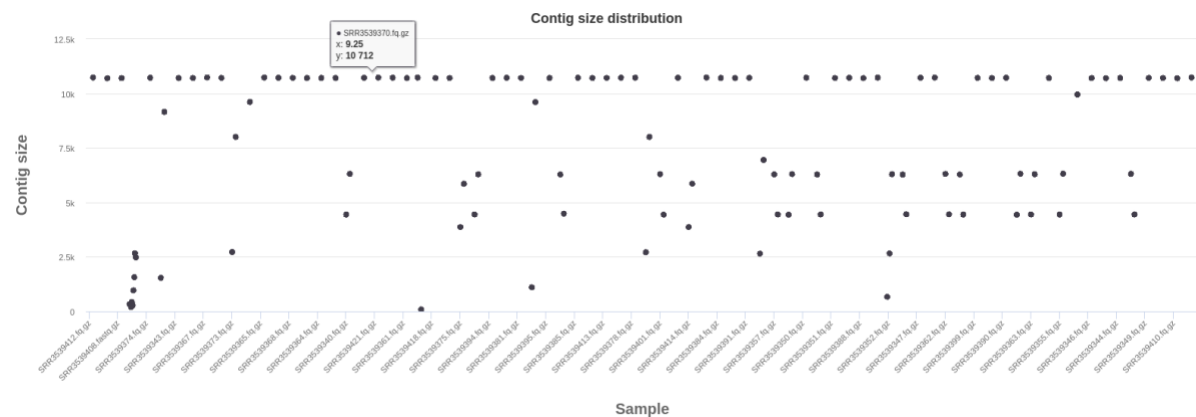

**Figure S4** - Contig size distribution of the amplicon sequencing dataset with 78 single-end samples. Each dot depicts an assembled DENV contig. Above the 10Kb are full CDS of DENV.

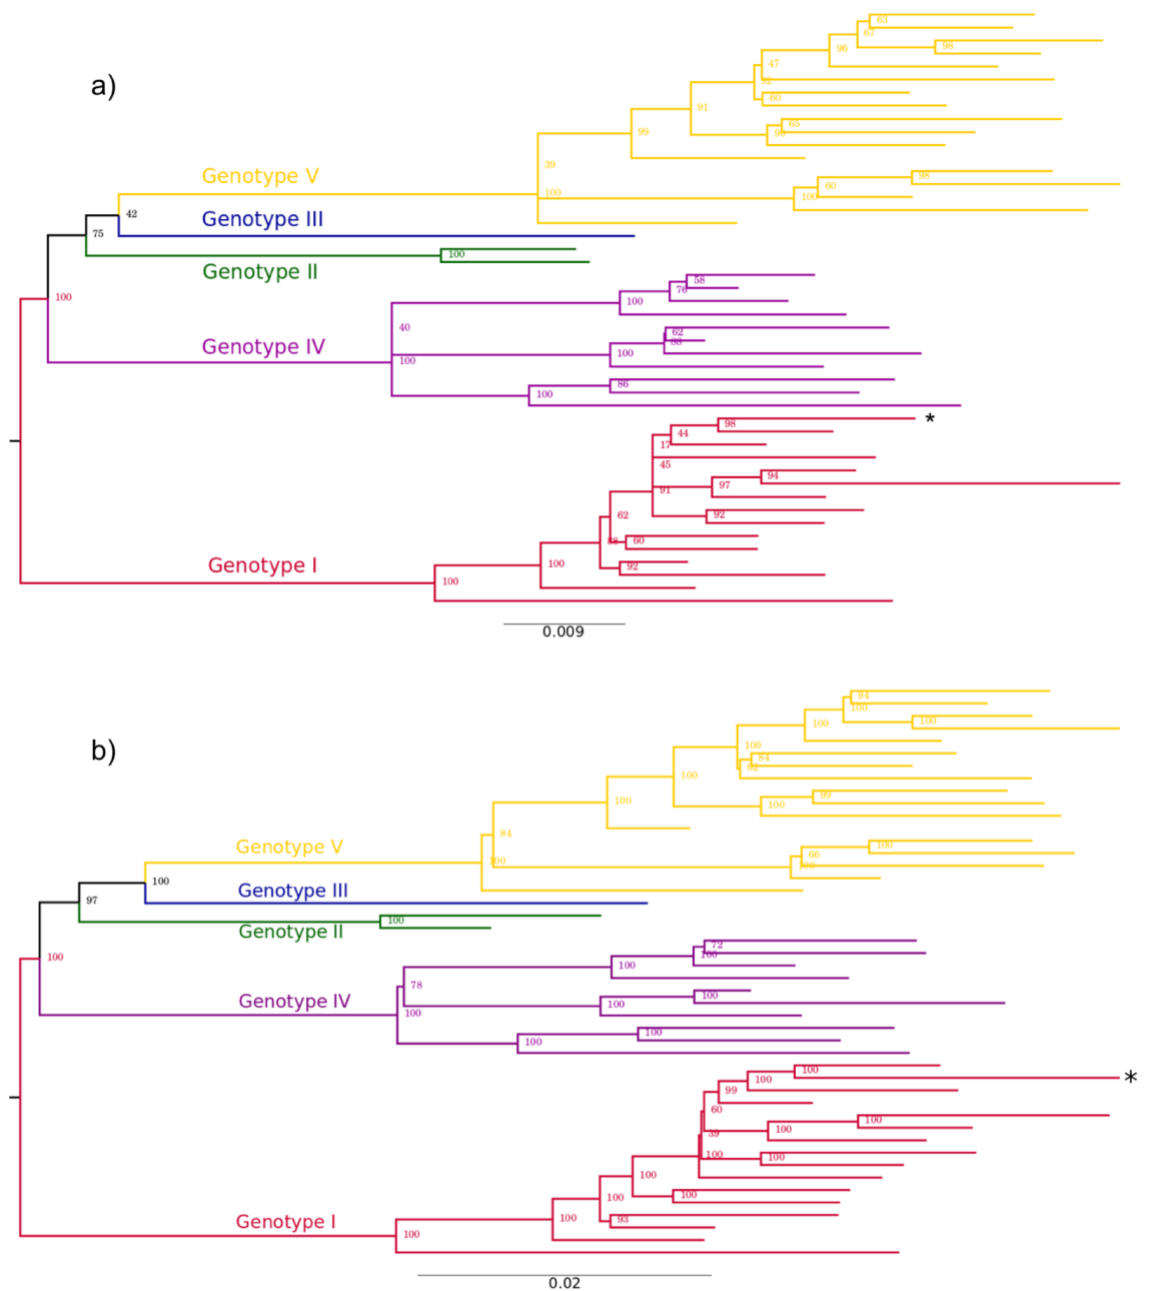

**Figure S5** - Maximum Likelihood inference of the multiple sequence alignment of the 46 DENV-1 complete genomes in the typing dataset, with **a)** envelope region and **b)** whole sequence. 1635 complete DENV-1 genomes were clustered at 98% nucleotide identity and the representative genomes were aligned with MAFFT. A maximum likelihood tree was inferred with RAxML. The tree is coloured according to genotype (red: genotype I; green: genotype II; blue: genotype III; purple: genotype IV). The sample JF459993, marked with a star, is currently annotated in ViPR as belonging to genotype IV but, given to the good phylogenetic support, it was re-classified as belonging to the genotype I.

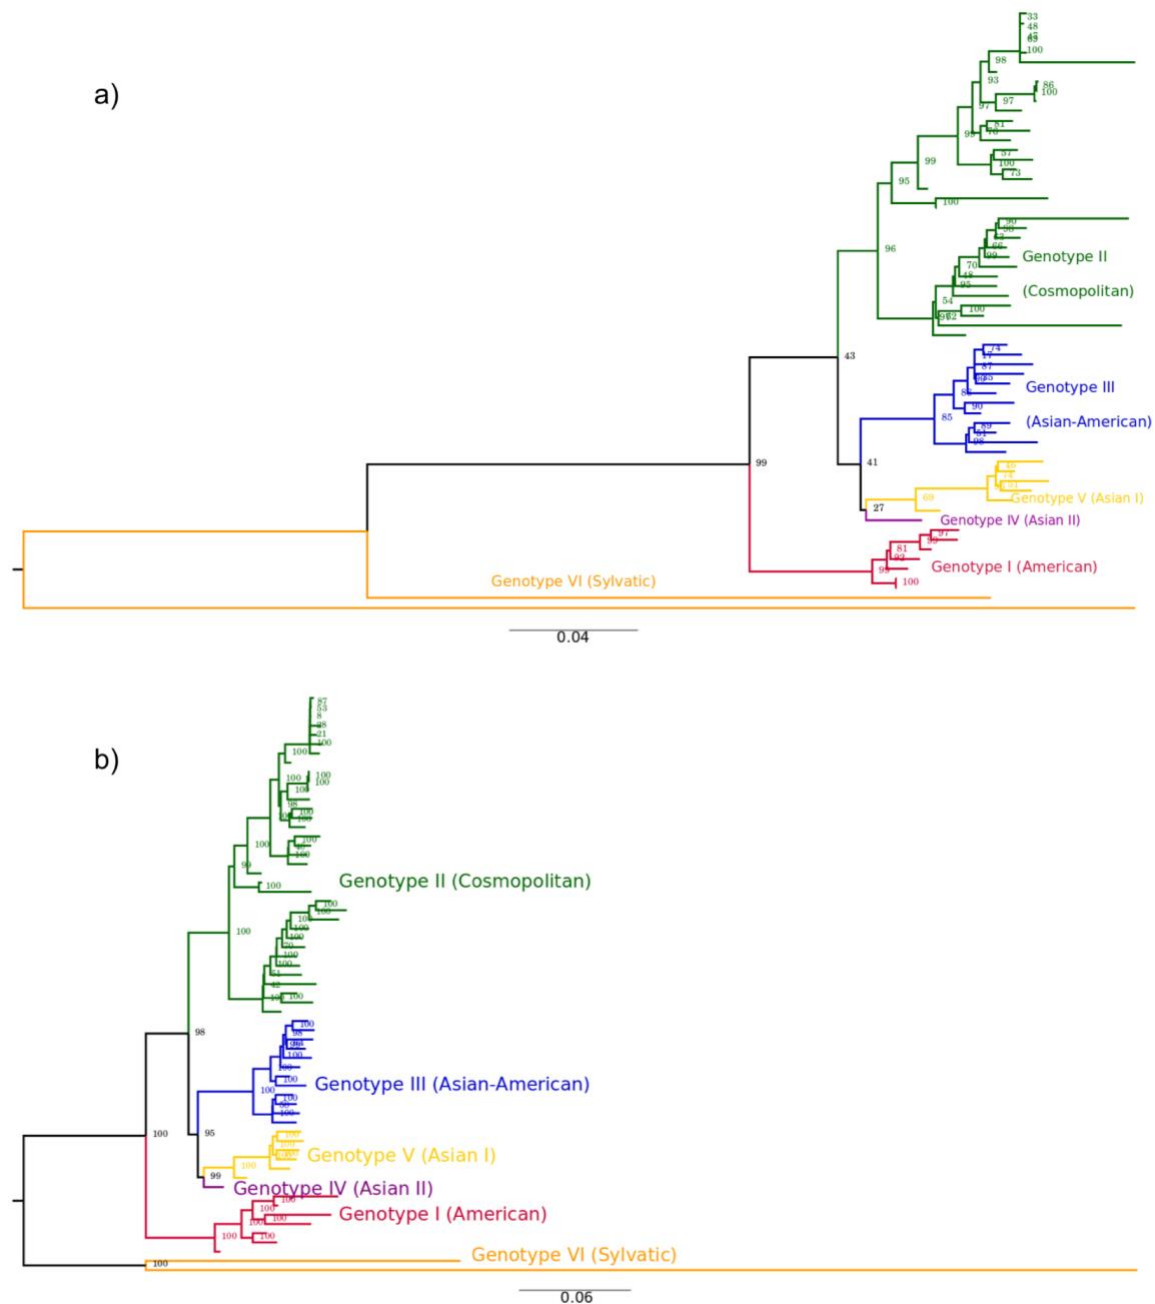

**Figure S6** - Maximum Likelihood inference of the multiple sequence alignment of the 63 DENV-2 complete genomes in the typing dataset, with **a)** envelope region and **b)** whole genome sequence. 1067 complete DENV-1 genomes were clustered at 98% nucleotide identity and the representative genomes were aligned with MAFFT. A maximum likelihood tree was inferred with RAxML. The tree is coloured according to genotype (red: genotype I; green: genotype II; blue: genotype III; purple: genotype IV).



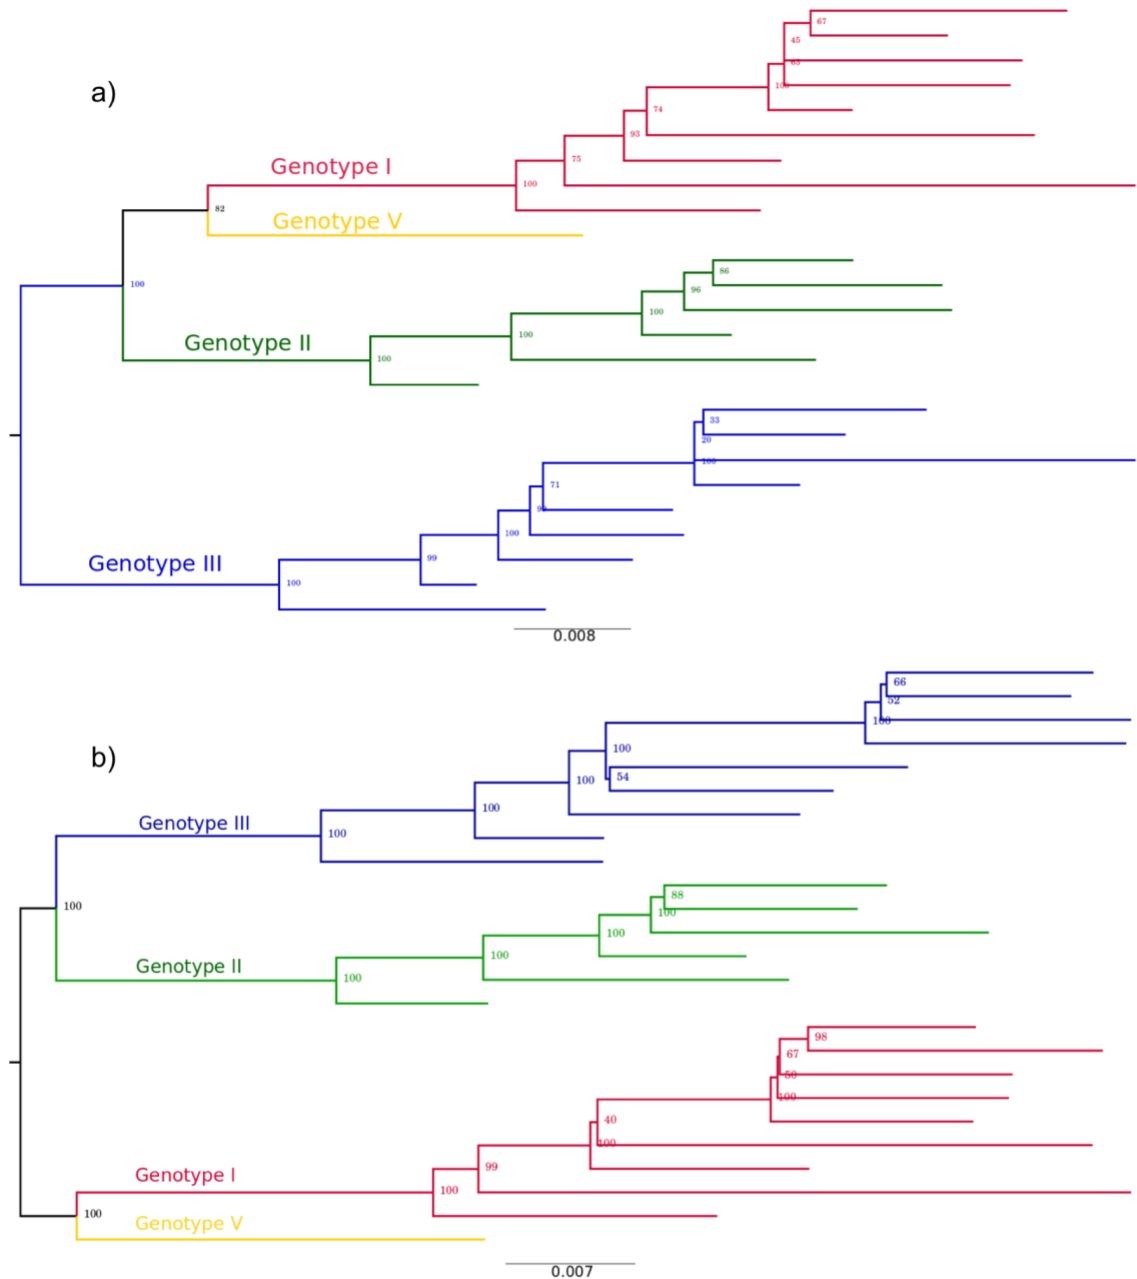

**Figure S7** - Maximum Likelihood inference of the multiple sequence alignment of the 25 DENV-3 complete genomes in the typing dataset, with **a)** envelope region and **b)** whole genome sequence. 807 complete DENV-3 genomes were clustered at 98% nucleotide identity and the representative genomes were aligned with MAFFT. A maximum likelihood tree was inferred with RAxML. The tree is coloured according to genotype (red: genotype I; green: genotype II; blue: genotype III; purple: genotype IV).

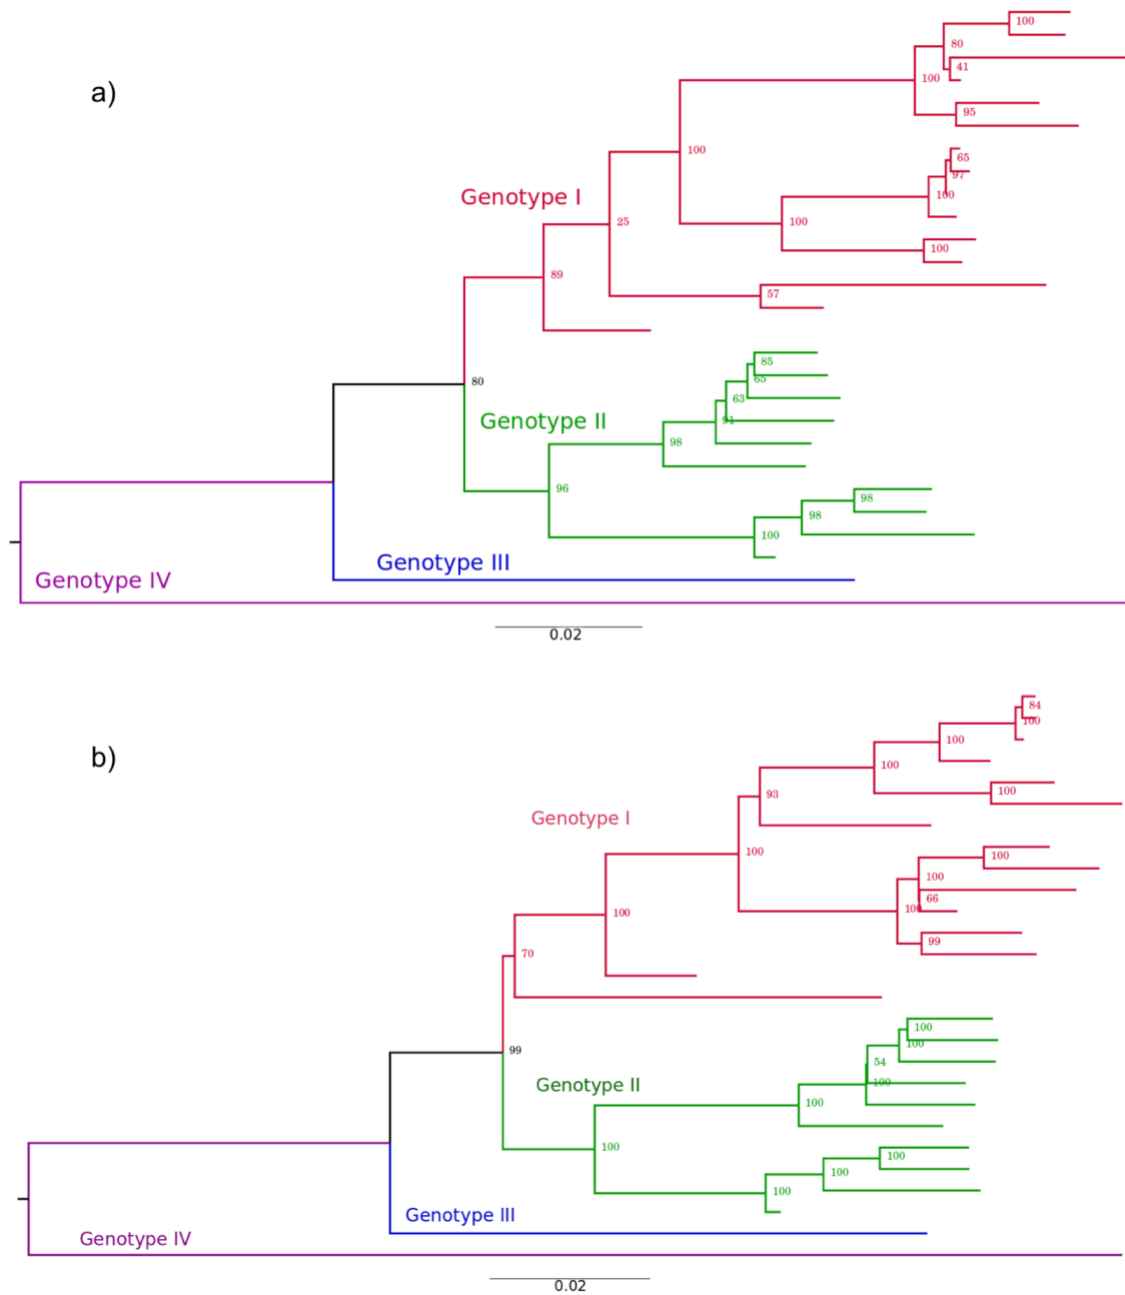

**Figure S8** - Maximum Likelihood inference of the multiple sequence alignment of the 27 DENV-4 complete genomes in the typing dataset, with **a)** envelope region and **b)** whole genome sequence. 320 complete DENV-4 genomes were clustered at 98% nucleotide identity and the representative genomes were aligned with MAFFT. A maximum likelihood tree was inferred with RAxML. The tree is coloured according to genotype (red: genotype I; green: genotype II; blue: genotype III; purple: genotype IV).

## 216 References

- 217 1. Pickett BE, Greer DS, Zhang Y, Stewart L, Zhou L, Sun G, et al. Virus pathogen Database and  
218 Analysis Resource (ViPR): A comprehensive bioinformatics Database and Analysis Resource  
219 for the Coronavirus research community. *Viruses*. 2012;4(11):3209–26.
- 220 2. Villabona-Arenas CJ, Zanotto PM de A. Worldwide Spread of Dengue Virus Type 1. *PLoS*  
221 *One*. 2013;8(5):e62649.
- 222 3. Vasilakis N, Weaver SC. Chapter 1 The History and Evolution of Human Dengue Emergence.  
223 In: *Advances in Virus Research* [Internet]. Elsevier Inc.; 2008. p. 1–76. Available from:  
224 [http://dx.doi.org/10.1016/S0065-3527\(08\)00401-6](http://dx.doi.org/10.1016/S0065-3527(08)00401-6)
- 225 4. Li W, Godzik A. Cd-hit : a fast program for clustering and comparing large sets of protein or  
226 nucleotide sequences. *Bioinformatics* [Internet]. 2006;22(13):1658–9. Available from:  
227 <https://academic.oup.com/bioinformatics/article/22/13/1658/194225>
- 228 5. Nakamura T, Yamada KD, Tomii K, Katoh K. Parallelization of MAFFT for large-scale  
229 multiple sequence alignments. *Bioinformatics* [Internet]. 2018;34(March):2490–2. Available  
230 from: [https://academic.oup.com/bioinformatics/advance-](https://academic.oup.com/bioinformatics/advance-article/doi/10.1093/bioinformatics/bty121/4916099)  
231 [article/doi/10.1093/bioinformatics/bty121/4916099](https://academic.oup.com/bioinformatics/advance-article/doi/10.1093/bioinformatics/bty121/4916099)
- 232 6. Stamatakis A. RAxML version 8: A tool for phylogenetic analysis and post-analysis of large  
233 phylogenies. *Bioinformatics*. 2014;30(9):1312–3.
- 234 7. Rico-Hesse R. Molecular evolution and distribution of dengue viruses type 1 and 2 in nature.  
235 *Virology* [Internet]. 1990 Feb;174(2):479–93. Available from:  
236 <https://linkinghub.elsevier.com/retrieve/pii/004268229090102W>
- 237 8. Rico-Hesse R. Microevolution and virulence of dengue viruses. *Adv Virus Res* [Internet].  
238 2003;59:315–41. Available from: <https://www.ncbi.nlm.nih.gov/pubmed/14696333>
- 239 9. Lanciotti R, Calisher C, Gubler D, Chang G, Vorndam A. Rapid detection and typing of  
240 dengue viruses from clinical samples by using reverse transcriptase-polymerase chain reaction.  
241 *J Clin Microbiol* [Internet]. 1992;30(3):545–51. Available from:  
242 <http://jcm.asm.org/content/30/3/545.short>
- 243 10. Trent DW, Lanciotti RS, Gubler DJ. Molecular evolution and phylogeny of dengue-4 viruses.  
244 *J Gen Virol* [Internet]. 1997 Sep 1;78(9):2279–84. Available from:  
245 <http://jgv.microbiologyresearch.org/content/journal/jgv/10.1099/0022-1317-78-9-2279>
- 246 11. Klungthong C, Zhang C, Mammen MP, Ubol S, Holmes EC. The molecular epidemiology of  
247 dengue virus serotype 4 in Bangkok, Thailand. *Virology*. 2004;329(1):168–79.
- 248 12. Zhang C, Jr MPM, Klungthong C, Monkongdee P, Nimmannitya S, Kalayanaroj S, et al.  
249 Clade Replacements in Dengue Virus Serotypes 1 and 3 Are Associated with Changing  
250 Serotype Prevalence Clade Replacements in Dengue Virus Serotypes 1 and 3 Are Associated  
251 with Changing Serotype Prevalence †. *J Virol*. 2005;79(24):15123–30.
- 252 13. Zhang C, Mammen MP, Chinnawirotpisan P, Klungthong C, Rodpradit P, Nisalak A, et al.  
253 Structure and age of genetic diversity of dengue virus type 2 in Thailand. *J Gen Virol*.  
254 2006;87(4):873–83.
- 255 14. Bolger AM, Lohse M, Usadel B. Trimmomatic: A flexible trimmer for Illumina sequence data.  
256 *Bioinformatics*. 2014;30(15):2114–20.
- 257 15. Schmieder R, Edwards R. Quality control and preprocessing of metagenomic datasets.  
258 *Bioinformatics*. 2011;27(6):863–4.
- 259 16. Langmead B, Salzberg SL. Fast gapped-read alignment with Bowtie 2. *Nat Methods* [Internet].  
260 2012 Apr 4;9(4):357–9. Available from: <http://www.nature.com/articles/nmeth.1923>
- 261 17. Bankevich A, Nurk S, Antipov D, Gurevich AA, Dvorkin M, Kulikov AS, et al. SPAdes: A

- New Genome Assembly Algorithm and Its Applications to Single-Cell Sequencing. *J Comput Biol* [Internet]. 2012 May;19(5):455–77. Available from: <http://online.liebertpub.com/doi/abs/10.1089/cmb.2012.0021>
18. Li D, Liu CM, Luo R, Sadakane K, Lam TW. MEGAHIT: An ultra-fast single-node solution for large and complex metagenomics assembly via succinct de Bruijn graph. *Bioinformatics*. 2015;31(10):1674–6.
19. Walker BJ, Abeel T, Shea T, Priest M, Abouelliel A, Sakthikumar S, et al. Pilon: An integrated tool for comprehensive microbial variant detection and genome assembly improvement. *PLoS One*. 2014;9(11).
20. Machado MP, Ribeiro-Gonçalves B, Silva M, Ramirez M, Carriço JA. Epidemiological Surveillance and Typing Methods to Track Antibiotic Resistant Strains Using High Throughput Sequencing. *Methods Mol Biol* [Internet]. 2017;1520:331–56. Available from: <http://www.ncbi.nlm.nih.gov/pubmed/27873262>
21. Santiago GA, Vergne E, Quiles Y, Cosme J, Vazquez J, Medina JF, et al. Analytical and Clinical Performance of the CDC Real Time RT-PCR Assay for Detection and Typing of Dengue Virus. *PLoS Negl Trop Dis*. 2013;7(7):36–8.
